# Supplementary material
Source: PubMed Central journal article supplement (PMC7482421)
Supplement: NIHMS1607371-supplement-Figures_and_Tables.pdf [file NIHMS1607371-supplement-Figures_and_Tables.pdf]

## Figures

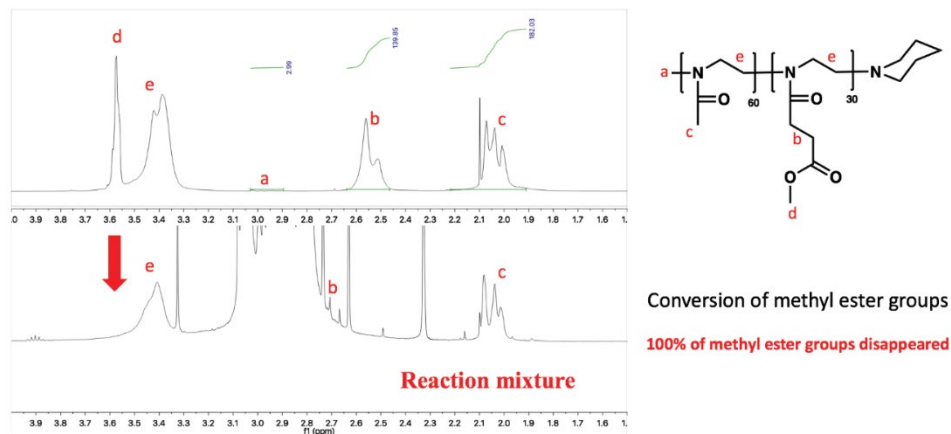

Figure S1.  $^1\text{H}$  NMR spectra of PMeOx-PMestOx (upper) and reaction mixture (PMeOx-PMestOx and *N,N*-dimethylbiguanide free base in DMF) (lower) ( $\text{CDCl}_3$ , 298K).

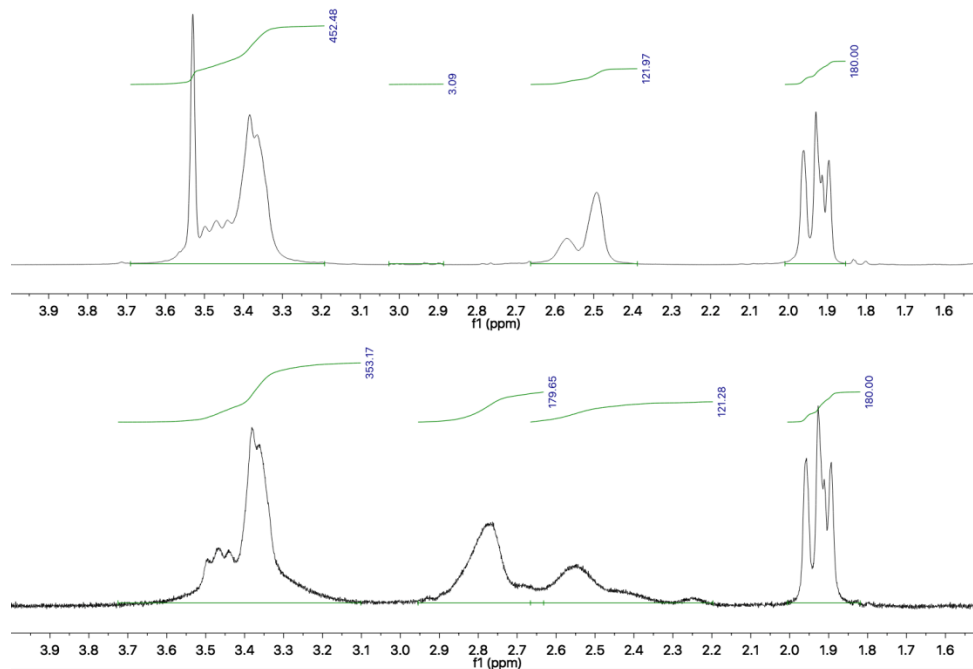

Figure S2.  $^1\text{H}$  NMR spectra of PMeOx-PMestOx (upper) and PMeOx-PcBOx (lower) ( $\text{D}_2\text{O}$ , 298K). From  $^1\text{H}$  NMR data the molecular mass ( $M_n$ ) of the polymers was 9.9 kDa for PMeOx-PMestOx and 12.2 kDa for PMeOx-PcBOx.

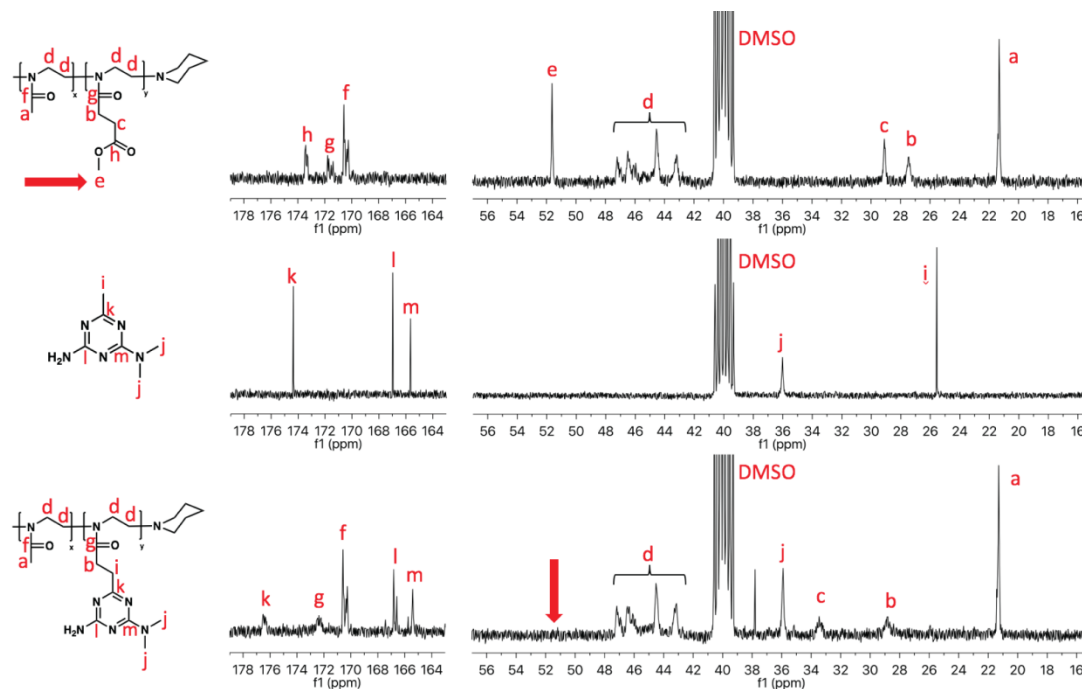

Figure S3. Overlay of the  $^{13}\text{C}$  NMR spectra of PMeOx-PMestOx, cBG and PMeOx-PcBOx ( $^{13}\text{C}$  NMR  $(\text{CD}_3)_2\text{SO}$ , 298 K).

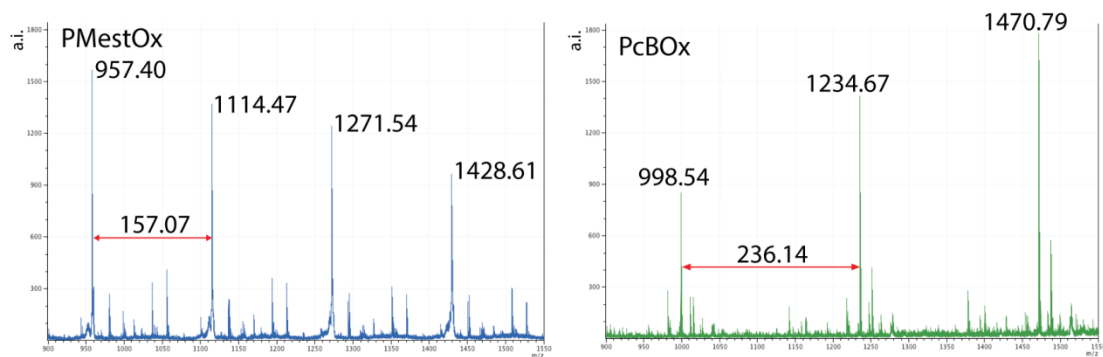

Figure S4. MALDI-TOF MS analysis of PMestOx and PcBOx homopolymers.

(A)

|                         | Size (d.nm):  | % Volume: | St Dev (d.nm): |
|-------------------------|---------------|-----------|----------------|
| Z-Average (d.nm): 36.88 | Peak 1: 27.93 | 97.5      | 8.404          |
| PdI: 0.277              | Peak 2: 1578  | 2.5       | 603.8          |
| Intercept: 0.932        | Peak 3: 0.000 | 0.0       | 0.000          |

Result quality : Good

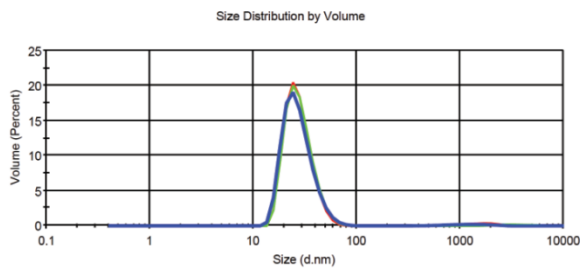

(B)

|                         | Size (d.nm):  | % Volume: | St Dev (d.nm): |
|-------------------------|---------------|-----------|----------------|
| Z-Average (d.nm): 88.99 | Peak 1: 411.9 | 4.7       | 243.3          |
| PdI: 0.486              | Peak 2: 34.77 | 94.9      | 20.32          |
| Intercept: 0.925        | Peak 3: 4744  | 0.4       | 1031           |

Result quality : Good

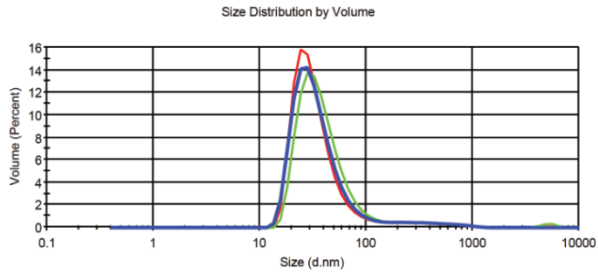

Figure S5. Volume based size distribution of (A) PMeOx-PcBOx (upper) and (B) DachPt-PMeOx-PcBOx (lower) measured by DLS with 1 mg/mL polymer solution in DI water.

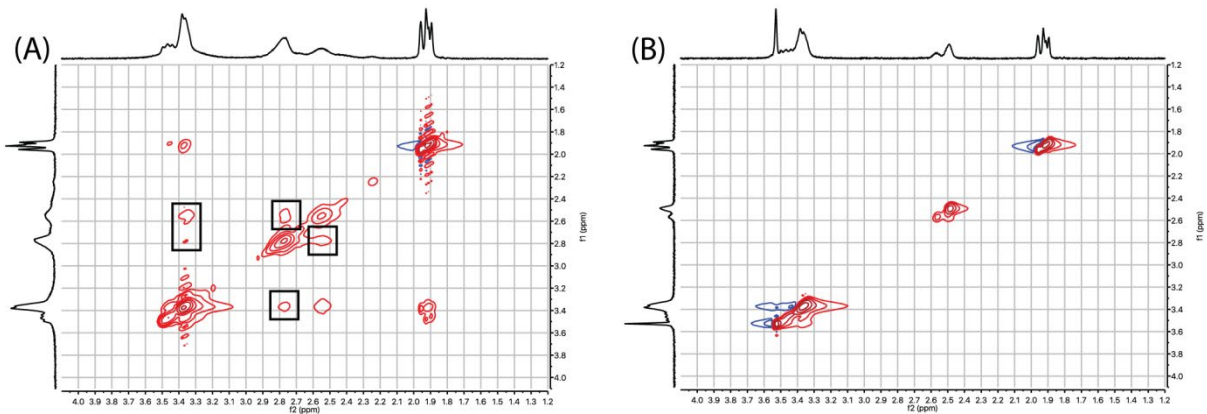

Figure S6. 2D NOESY NMR spectra of (a) PMeOx-PcBOx (1 mg/mL) and (b) PMeOx-PMestOx (1 mg/mL) in D<sub>2</sub>O.

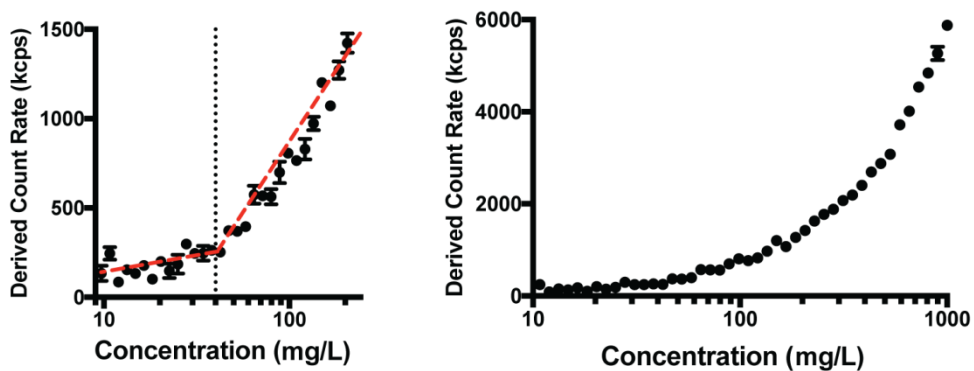

Figure S7. Measurement of the CMC of PMeOx-PcBOx in DI water by light scattering measurement.

## Tables

| Drug            | P2    |     |       |      |       |      |       |      |       |      |     | PMeOx-PcBOx |     |      |      |      |      |      |      |     |  |
|-----------------|-------|-----|-------|------|-------|------|-------|------|-------|------|-----|-------------|-----|------|------|------|------|------|------|-----|--|
|                 | 10:1  |     | 10:2  |      | 10:4  |      | 10:8  |      | 10:10 |      | SD  | 10:1        |     | 10:2 |      | 10:3 |      | 10:4 |      | SD  |  |
|                 | LE%   | LC% | LE%   | LC%  | LE%   | LC%  | LE%   | LC%  | LE%   | LC%  | LC% | LE%         | LC% | LE%  | LC%  | LE%  | LC%  | LE%  | LC%  | LC% |  |
| Imiquimod       | 6.1   | 0.6 | -     | -    | -     | -    | -     | -    | -     | -    | 0.1 | 0.0         | 0.0 | -    | -    | -    | -    | -    | -    | 0.0 |  |
| LY2109761       | 100.0 | 9.1 | 81.7  | 14.0 | -     | -    | -     | -    | -     | -    | 0.4 | 91.5        | 8.4 | 92.0 | 15.5 | 95.9 | 22.4 | 82.1 | 24.7 | 0.2 |  |
| Bruceantin      | 100.0 | 9.1 | 100.0 | 16.7 | 100.0 | 28.6 | 100.0 | 44.4 | 99.8  | 49.9 | 0.3 | -           | -   | 65.2 | 11.5 | -    | -    | -    | -    | 0.7 |  |
| SN-38           | 0.0   | 0.0 | -     | -    | -     | -    | -     | -    | -     | -    | 0.0 | 0.1         | 0.0 | -    | -    | -    | -    | -    | -    | 0.0 |  |
| LY364947        | 12.2  | 1.2 | 6.1   | 1.2  | -     | -    | -     | -    | -     | -    | 0.4 | 3.2         | 0.3 | -    | -    | -    | -    | -    | -    | -   |  |
| GDC-0941        | 9.8   | 1.0 | -     | -    | -     | -    | -     | -    | -     | -    | 0.5 | 44.5        | 4.3 | -    | -    | -    | -    | -    | -    | -   |  |
| Aclacinomycin A | 40.3  | 3.9 | 16.5  | 3.2  | 12.0  | 4.6  | -     | -    | -     | -    | 1.6 | 36.6        | 6.8 | -    | -    | -    | -    | -    | -    | 0.8 |  |
| Paclitaxel      | 100.0 | 9.1 | 100.0 | 16.7 | 100.0 | 28.6 | 86.1  | 40.8 | -     | -    | 1.6 | 66.9        | 6.3 | -    | -    | -    | -    | -    | -    | 1.9 |  |
| Wortmannin      | 16.2  | 1.6 | -     | -    | -     | -    | -     | -    | -     | -    | 0.2 | 46.6        | 3.8 | -    | -    | -    | -    | -    | -    | 1.1 |  |
| GW788388        | 13.1  | 1.3 | -     | -    | -     | -    | -     | -    | -     | -    | 0.1 | 2.3         | 0.2 | -    | -    | -    | -    | -    | -    | -   |  |

**Table S1.** Loading efficiency (LE%) and capacity (LC%) in P2 or PMeOx-PcBOx for each drug in each feeding ratio. Maximum LE% and LC% were highlighted and SD were calculated only for them.

| Drug            | Solubility in PMeOx-PcBOx (mg/mL) | Solubility in P2 (mg/mL) | Aqueous Solubility (mg/mL) |
|-----------------|-----------------------------------|--------------------------|----------------------------|
| Paclitaxel      | 0.66                              | 6.86                     | 0.0085                     |
| Bruceantin      | 1.86                              | 10.00                    | 0.00804                    |
| Imiquimod       | 0.00                              | 0.06                     | 0.00625                    |
| LY2109761       | 2.87                              | 1.63                     | <0.1                       |
| SN-38           | 0.00                              | 0.00                     | <0.1                       |
| LY364947        | 0.03                              | 0.12                     | <0.1                       |
| GDC-0941        | 0.45                              | 0.10                     | 0.00513                    |
| Aclacinomycin A | 0.73                              | 0.48                     | 0.21                       |
| GW788388        | 0.02                              | 0.13                     | <0.1                       |
| Wortmannin      | 0.40                              | 0.10                     | 0.00428                    |

**Table S2.** Maximal absolute loading achieved in the polymer system and the innate water solubility of the drug (mg/mL).
